# Supplementary material for: Health and Wellness Impacts of Traditional Physical Activity Experiences on Indigenous Youth: A Systematic Review
Source: MDPI journal article supplement (doi:10.3390/ijerph17218275), 2020-11-09
Supplement: s1 [file s1]

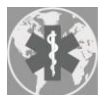

**Table 1.** Search strategy for four databases (Pubmed, Web of Science, ERIC, Scopus) included in systematic review for traditional physical activity of Indigenous youth.

| Search Strategy                    |                                                                                                                                                                                                                                                                                                                                                                                                          |                                                                                                                                                                                                                                                                                                                                                                                                                      |                                                                                                                                                                                                                                                                                                                                                                                                  |                                                                                                                                                                                                                                                                                                                                                                                                                                                                                  |
|------------------------------------|----------------------------------------------------------------------------------------------------------------------------------------------------------------------------------------------------------------------------------------------------------------------------------------------------------------------------------------------------------------------------------------------------------|----------------------------------------------------------------------------------------------------------------------------------------------------------------------------------------------------------------------------------------------------------------------------------------------------------------------------------------------------------------------------------------------------------------------|--------------------------------------------------------------------------------------------------------------------------------------------------------------------------------------------------------------------------------------------------------------------------------------------------------------------------------------------------------------------------------------------------|----------------------------------------------------------------------------------------------------------------------------------------------------------------------------------------------------------------------------------------------------------------------------------------------------------------------------------------------------------------------------------------------------------------------------------------------------------------------------------|
| Names of database                  | Pubmed                                                                                                                                                                                                                                                                                                                                                                                                   | Web of Science                                                                                                                                                                                                                                                                                                                                                                                                       | ERIC                                                                                                                                                                                                                                                                                                                                                                                             | Scopus                                                                                                                                                                                                                                                                                                                                                                                                                                                                           |
| Database time coverage             | 1900-Present                                                                                                                                                                                                                                                                                                                                                                                             | 1900-Present                                                                                                                                                                                                                                                                                                                                                                                                         | 1966-Present                                                                                                                                                                                                                                                                                                                                                                                     | 2004-Present                                                                                                                                                                                                                                                                                                                                                                                                                                                                     |
| Date searched                      | April 25, 2016, May 13, 2018                                                                                                                                                                                                                                                                                                                                                                             | April 26, 2016, May 12, 2018                                                                                                                                                                                                                                                                                                                                                                                         | April 27, 2016, May 11, 2018                                                                                                                                                                                                                                                                                                                                                                     | May 14, 2018                                                                                                                                                                                                                                                                                                                                                                                                                                                                     |
| Number of records                  | 2877                                                                                                                                                                                                                                                                                                                                                                                                     | 4030                                                                                                                                                                                                                                                                                                                                                                                                                 | 1696                                                                                                                                                                                                                                                                                                                                                                                             | 74                                                                                                                                                                                                                                                                                                                                                                                                                                                                               |
| Search strategy from each database | (((America* or Australia* or Canada or Canadian or New Zealand* or United States)) AND (aboriginal* or "first nation*" or indigenous* or inuit or islander* or métis or metis or native* or indian*)) AND (physical activity or activity or sport or exercise or fitness)) AND (subsistence or land or land-based or traditional or country or hunt* or gather* or fish* or forag* or cultur* or water)) | (ALL=(America* or Australia* or Canada or Canadian or New Zealand* or United States) AND ALL=(aboriginal* or "first nation*" or indigenous* or inuit or islander* or métis or metis or native* or indian*) AND ALL=(physical activity or activity or sport or exercise or fitness) AND ALL=(subsistence or land or land-based or traditional or country or hunt* or gather* or fish* or forag* or cultur* or water)) | (america* or australia* or canada or canadian or new zealand* or united states) AND (aboriginal* or first nation* or indigenous* or inuit or islander* or métis or metis or native* or indian*) AND (physical activity or activity or sport or exercise or fitness) AND (subsistence or land or land-based or traditional or country or hunt* or gather* or fish* or forag* or cultur* or water) | TITLE-ABS-KEY ( america* OR australia* OR canada OR canadian OR new AND zealand* OR united AND states ) AND TITLE-ABS-KEY ( aboriginal* OR first AND nation* OR indigenous* OR inuit OR islander* OR métis OR metis OR native* OR indian* ) AND TITLE-ABS-KEY ( physical AND activity OR activity OR sport OR exercise OR fitness ) AND TITLE-ABS-KEY ( subsistence OR land OR land-based OR traditional OR country OR hunt* OR gather* OR fish* OR forag* OR cultur* OR water ) |
| Filters                            | Filters: <b>Humans, English, from 2006 - 2018</b> Sort by: <b>Publication Date</b>                                                                                                                                                                                                                                                                                                                       | AND LANGUAGE: (English)<br><b>Refined by: WEB OF SCIENCE CATEGORIES:</b> ( SUBSTANCE ABUSE OR ENVIRONMENTAL SCIENCES OR AGRICULTURE MULTIDISCIPLINARY OR PUBLIC ENVIRONMENTAL OCCUPATIONAL HEALTH OR MULTIDISCIPLINARY SCIENCES OR PSYCHOLOGY MULTIDISCIPLINARY OR HOSPITALITY LEISURE SPORT TOURISM OR SOCIOLOGY OR BEHAVIORAL SCIENCES OR FISHERIES OR                                                             | Publication date: Last 5 years (in 2018); last 10 years (in 2016)                                                                                                                                                                                                                                                                                                                                | PUBYEAR > 2005 AND PUBYEAR < 2019                                                                                                                                                                                                                                                                                                                                                                                                                                                |

---

GEOGRAPHY OR SOCIAL SCIENCES BIOMEDICAL  
OR GEOSCIENCES MULTIDISCIPLINARY OR  
PSYCHOLOGY CLINICAL OR SPORT SCIENCES OR  
EDUCATION EDUCATIONAL RESEARCH OR  
ANTHROPOLOGY OR ENVIRONMENTAL STUDIES  
OR ORTHOPEDICS OR HISTORY OR NUTRITION  
DIETETICS OR HEALTH POLICY SERVICES OR  
REGIONAL URBAN PLANNING OR MEDICINE  
GENERAL INTERNAL OR NEUROSCIENCES OR  
HEALTH CARE SCIENCES SERVICES OR  
REHABILITATION OR INTEGRATIVE  
COMPLEMENTARY MEDICINE OR  
COMMUNICATION OR PHYSIOLOGY OR  
PSYCHIATRY OR CULTURAL STUDIES OR SOCIAL  
SCIENCES INTERDISCIPLINARY OR FORESTRY OR  
NURSING )

**Timespan:** 2006-2018. **Indexes:** SCI-EXPANDED, SSCI,  
A&HCI.

---

Adapted from: <https://libraryguides.mcgill.ca/knowledge-syntheses/documenting>



**Table 3.** Details on included studies' framework, analysis techniques and degree of community involvement for systematic review on traditional physical activity of Indigenous youth.

| Study                                                                                    | Framework                                  | Data Techniques    | Analysis                                                  | Community Involvement                                                                                                                                                                                                                          |
|------------------------------------------------------------------------------------------|--------------------------------------------|--------------------|-----------------------------------------------------------|------------------------------------------------------------------------------------------------------------------------------------------------------------------------------------------------------------------------------------------------|
| Boyd and Braun [2]                                                                       | Not specified                              | Inductive analysis | transcript analysis → thematic analysis                   | Community action group (CAG) - Key informants included elders, college admins, college students, Native Hawaiians, health professionals. CAG guided procedures, feedback from participants was incorporated. CAG validated FG findings         |
| Crowe, Stanley, Probst and McMahon [3]                                                   | Grounded theory                            |                    | Thematic analysis                                         | Community consultation to build trust/relationship, negotiation of objectives and procedures. Adjustments made on FG guide. Findings presented to community (Board of Managers)                                                                |
| Dubnewick, Hopper, Spence and McHugh [4]                                                 | Integrated Indigenous-ecological model     | Inductive analysis | content analysis                                          | Researchers had prior collaborating relationship with community. Research team included community members, negotiated purpose and procedure with communities. Elder and traditional game organization members provided feedback on FG findings |
| Janelle, Laliberté and Ottawa [5]                                                        | Not specified                              |                    | Observation grid                                          | Supervised by community workers, partnership with community teams to develop procedures and evaluation                                                                                                                                         |
| Kerpan and Humbert [6]                                                                   | Not specified                              |                    | Ethnographical analysis                                   | Researcher spent a year volunteering and coaching at the school prior to study. Triangulation of data and member checking with school and participants                                                                                         |
| MacDonald, Willox, Ford, Shiwak, Wood, Government and Team [7]                           | Not specified                              |                    | Constant comparative method to develop concepts and codes | Results sharing workshops and open houses hosted in each community, validated themes and findings with participants, community members and LRCs                                                                                                |
| Nelson [8]                                                                               | Critical race theory, post colonial theory |                    | Thematic analysis                                         | Author worked with school for 10 years prior, peer discussions                                                                                                                                                                                 |
| Petrucka, Bassendowski, Goodwill, Wajunta, Yuzicappi, Yuzicappi, Hackett and Jeffery [9] | Not specified                              |                    | Thematic analysis                                         | Youth and community were involved as co-researchers, researchers had long term relationships with Elders who contributed to study procedures. Knowledge sharing processes with participants and interested parties                             |
| Pigford, Willows, Holt, Newton and Ball [10]                                             | Ecological lens                            |                    | Thematic analysis                                         | Study conducted by request of community member. Steering committee (Elders, educators, health workers, community departments) reviewed protocol and article, ensured cultural sensitivity. Children were included as key informants            |

---

## References

1. Joanna Briggs Institute, JBI critical appraisal checklist for qualitative research. [http://joannabriggs.org/assets/docs/critical-appraisal-tools/JBI\\_Critical\\_Appraisal-Checklist\\_for\\_Qualitative\\_Research2017.pdf](http://joannabriggs.org/assets/docs/critical-appraisal-tools/JBI_Critical_Appraisal-Checklist_for_Qualitative_Research2017.pdf) **2017**.
2. Boyd, J. K.; Braun, K. L., Peer Reviewed: Supports for and Barriers to Healthy Living for Native Hawaiian Young Adults Enrolled in Community Colleges. *Preventing Chronic Disease* **2007**, 4, (4).
3. Crowe, R.; Stanley, R.; Probst, Y.; McMahon, A., Culture and healthy lifestyles: a qualitative exploration of the role of food and physical activity in three urban Australian Indigenous communities. *Australian and New Zealand journal of public health* **2017**, 41, (4), 411-416.
4. Dubnewick, M.; Hopper, T.; Spence, J. C.; McHugh, T.-L. F., "There's a cultural pride through our games": Enhancing the sport experiences of Indigenous youth in Canada through participation in traditional games. *Journal of Sport and Social Issues* **2018**, 42, (4), 207-226.
5. Janelle, A.; Laliberté, A.; Ottawa, U., Promoting traditions: An evaluation of a wilderness activity among First Nations of Canada. *Australasian Psychiatry* **2009**, 17, (1\_suppl), S108-S111.
6. Kerpan, S.; Humbert, L., Playing together: The physical activity beliefs and behaviors of urban Aboriginal youth. *Journal of Physical Activity and Health* **2015**, 12, (10), 1409-1413.
7. MacDonald, J. P.; Willox, A. C.; Ford, J. D.; Shiwak, I.; Wood, M.; Government, R. I. C.; Team, I., Protective factors for mental health and well-being in a changing climate: Perspectives from Inuit youth in Nunatsiavut, Labrador. *Social Science & Medicine* **2015**, 141, 133-141.
8. Nelson, A., Sport, physical activity and urban Indigenous young people. *Australian Aboriginal Studies* **2009**, (2), 101.
9. Petrucka, P.; Bassendowski, S.; Goodwill, W.; Wajunta, C.; Yuzicappi, B.; Yuzicappi, L.; Hackett, P.; Jeffery, B., Positive leadership, legacy, lifestyles, attitudes, and activities for Aboriginal youth: A wise practices approach for positive Aboriginal youth futures. *International Journal of Indigenous Health* **2016**, 11, (1), 177.
10. Pigford, A.-A. E.; Willows, N. D.; Holt, N. L.; Newton, A. S.; Ball, G. D., Using First Nations children's perceptions of food and activity to inform an obesity prevention strategy. *Qualitative Health Research* **2012**, 22, (7), 986-996.
